# Supplementary material
Source: MDPI journal article supplement (https://www.mdpi.com/2071-1050/15/11/9060)
Supplement: s1 [file s1]

## **Supplementary materials for**

### **Ultrasonic–Thermal Regeneration of Spent Powdered Activated Carbon**

**Tingting Zhang<sup>1,2\*</sup>, Yanling Yang<sup>3</sup>, Xing Li<sup>3</sup>, Zhiwei Zhou<sup>3</sup>, Bigui Wei<sup>1,2</sup>**

(1. School of Environmental and Municipal Engineering, Lanzhou Jiaotong University, Lanzhou 730070, China;

2. Key laboratory of Yellow River Water Environment in Gansu Province, Lanzhou 730070, China;

3. Faculty of Architecture, Civil and transportation Engineering, Beijing University of Technology, Beijing 100124, China;)

#### **E-mails for all authors:**

**Tingting Zhang**, zhangting1229ztt@163.com

**Yanling Yang**, yangyanling@bjut.edu.cn

**Xing Li**, lixing@bjut.edu.cn

**Zhiwei Zhou**, hubeizhouzhiwei@163.com

**Bigui Wei**, weibg@mail.lzjtu.cn

**\* Corresponding author**, Tel: +86 18810135829; Lanzhou Jiaotong University, No.88

Anning West Road, An Ning District, Gansu 730070, China.

E-mail address: zhangting1229ztt@163.com

**Supplementary materials include three supplementary figures.**

#### **Supplementary figures:**

##### **Figures captions:**

**Figure S1. Effect of regeneration temperature on regeneration rate of PAC (a) regeneration time 30min, (b) regeneration time 60min**

**Figure S2. Effects of regeneration time on PAC regeneration rate and mass loss rate**

**Figure S3. The survey scan XPS spectrum of the PAC**

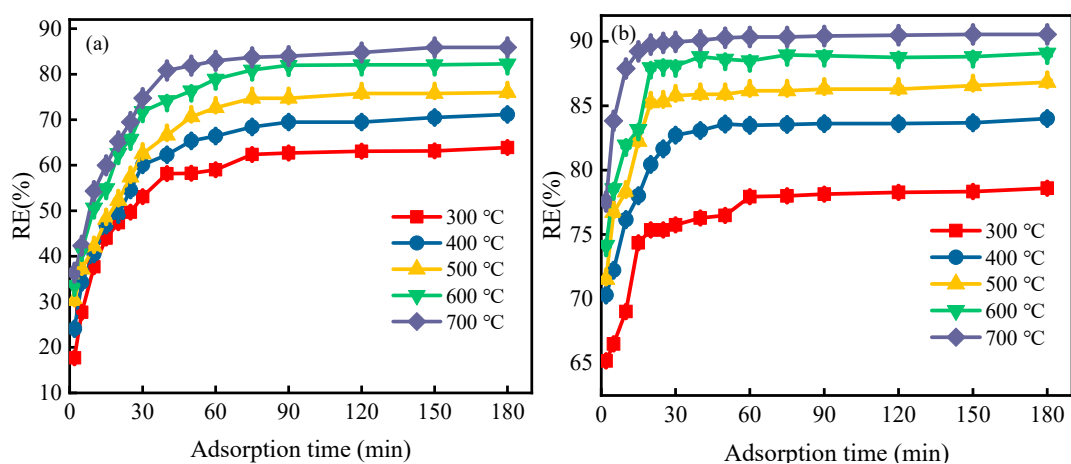

**Figure S1.** Effect of regeneration temperature on regeneration rate of PAC (a) regeneration time 30min, (b) regeneration time 60min

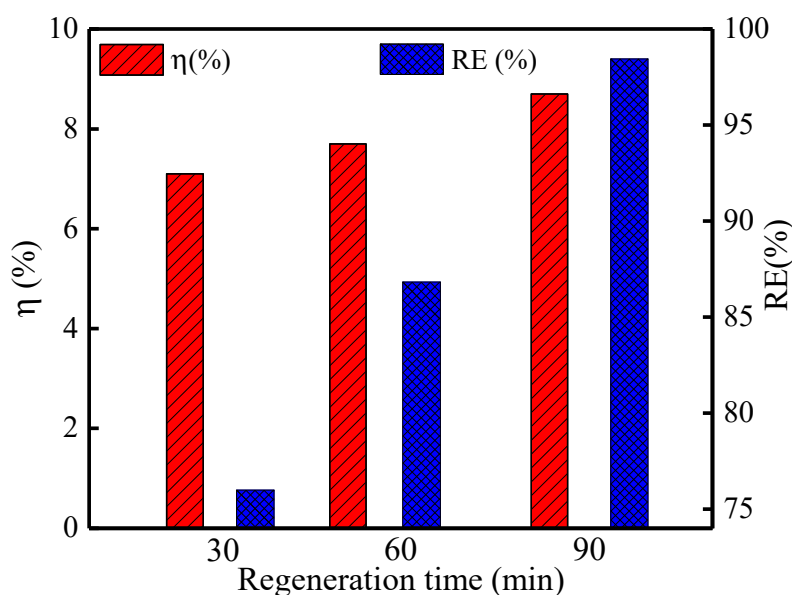

**Figure S2.** Effects of regeneration time on PAC regeneration rate and mass loss rate

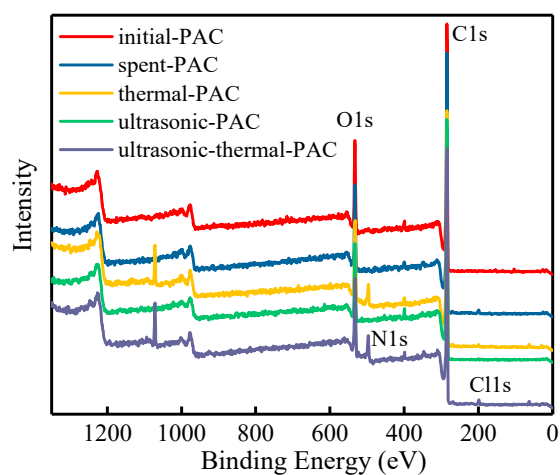

**Figure S3.** The survey scan XPS spectrum of the PAC
